# Supplementary material for: Green catalytic conversion of bio-based sugars to 5-chloromethyl furfural in deep eutectic solvent, catalyzed by metal chlorides
Source: Royal Society of Chemistry journal article supplement (doi:10.1039/c6ra00267f), 2016-01-01
Supplement: c6ra00267f1.pdf [file c6ra00267f1.pdf]

## Supporting Information

Green catalytic conversion of bio-based sugars to 5-  
(chloromethyl) furfural in deep eutectic solvent, catalyzed by  
metal chlorides

Miao Zuo, Zheng Li, Yetao Jiang, Xing Tang, Xianhai Zeng\*, Yong Sun, Lu Lin\*

## Materials and method

### Materials

Fructose (99%), glucose (99%), inulin (99%), sucrose (99%) Choline chloride (99%), metal chlorides were purchased from Aladdin Chemical Technology Co. Ltd. (Shanghai, China). Methyl isobutyl ketone (MIBK), Gamma-valerolactone (GVL), Acetonitrile (MeCN), Dimethyl Formamide (DMF), Dimethylsulfoxide (DMSO) were purchased from sinopharm Chemical reagent Co. Ltd. (Shanghai, China), CMF (95%) was purchased from Toronto Research Chemicals Co. Ltd. (Beijing, China), HMF (99%) was purchased from Sigma-Aldrich Chemical Technology Co. Ltd. (Shanghai, China).

### Typical procedure for the conversion of bio-based sugar into 5-CMF

In a typical procedure, the synthesis of substrate into 5-CMF reacted in glass flask (100ml) with reflux device, 900 mg bio-based sugar and 5mmol metal chloride catalyst and 25mmol ChCl were introduced into flask, and 30ml MIBK was added in the reactor as a extracting solvent, the solution was then stirred at 120 °C. At the desire time, separated the extracting solvent after the reactor was cooled down to room temperature, and extracted the reaction mixture with 30ml additional extracting solvent. The organic phase containing 5-CMF & 5-HMF was analyzed by GC-MS, the solid phase was also analyzed to determine the amount of unreacted bio-based sugar. To this end, the solid phase was dissolved with deionized water and analyzed by HPLC.

### GC-MS analysis

5-CMF and 5-HMF in the extracting solvent was diluted with acetonitrile (MeCN) and quantitatively analyzed by a Thermo-fisher Trace 1300 & ISQ LT GC-MS instrument with an TR-5MS column (15.0 m × 250 μm × 0.25 μm). The following programmed temperature was used in the analysis: 323 K (1 min) - 8 K/min - 423 K (1 min). The carrier gas was He with a flow rate of 1.2 mL min<sup>-1</sup> and the split ratio was 1:50. The mass spectra were obtained by electron impact ionization (EI), at an electron energy of 70 eV and with a 25 μA emission current. 5-CMF and 5-HMF yield and glucose conversion were calculated as follows:

$$5 - \text{CMF yield (\%)} = \frac{\text{mole of 5 - CMF in products}}{\text{starting mole of fructose}} \times 100\%$$

$$5 - \text{HMF yield (\%)} = \frac{\text{mole of 5 - HMF in products}}{\text{starting mole of fructose}} \times 100\%$$

### HP-LC analysis

The fructose conversion was analyzed using HPLC method on an Waters 2695 Separation Module equipped with a refractive index detector and a Bio-Rad Aminex HPX-87H ion exclusion column (300 mm × 7.8 mm). The column oven temperature was 60 °C and the mobile phase was 0.005 M H<sub>2</sub>SO<sub>4</sub> at a flow rate of 0.6 mL min<sup>-1</sup>. After the 5-CMF preparation reaction and the separation of organic phase, the reaction mixture was dissolved in 50ml deionized water. The fructose conversion was calculated as follows:

$$\text{Fructose conversion (\%)} = \frac{\text{mole of fructose in reaction mixture}}{\text{starting mole of fructose}} \times 100\%$$

### Effect of Lewis acid strength of metal chlorides on the reaction

The Lewis acid strength of various metal chlorides were calculated according to Equation 1<sup>1</sup>. Z is the charge number of the atomic core,  $r_k$  is the ionic radius and the metal electronegativity is marked as  $X_z$ , as shown in Table 1. It was noted that the Lewis acid strength have a great effect on the selectivity and conversion of fructose into 5-CMF and 5-HMF. Metal chlorides with low Lewis acid strengths provided much higher 5-HMF yields than 5-CMF, while A highest 5-CMF yield of 37% was obtained in the presence of AlCl<sub>3</sub>·6H<sub>2</sub>O without any optimizing conditions, which had much higher Lewis acid strength. FeCl<sub>3</sub>·6H<sub>2</sub>O with a rather high Lewis acid strength also provided higher 5-CMF yield (28%) than 5-HMF (15%). Thus, AlCl<sub>3</sub>·6H<sub>2</sub>O was chosen as catalyst for further investigation.

$$Z = \frac{z}{r_k^2} - 2.99 \times X_z + 0.67$$

**Table S1.** Effect of Lewis acid strength of metal chlorides on the reaction

| Catalysts                            | Lewis acid strength Z | Y <sub>CMF</sub> (%) | Y <sub>HMF</sub> (%) |
|--------------------------------------|-----------------------|----------------------|----------------------|
| AlCl <sub>3</sub> ·6H <sub>2</sub> O | 2.4401                | 37                   | 17                   |
| NaCl                                 | -1.3697               | 0.5                  | 48                   |
| CrCl <sub>3</sub> ·6H <sub>2</sub> O | 0.9696                | 5                    | 39                   |
| FeCl <sub>3</sub> ·6H <sub>2</sub> O | 1.4993                | 28                   | 15                   |
| LiCl·H <sub>2</sub> O                | -1.0262               | 0.6                  | 57                   |
| ZnCl <sub>2</sub>                    | -0.6115               | 0                    | 1                    |
| MgCl <sub>2</sub> ·6H <sub>2</sub> O | -0.5429               | 1                    | 47                   |
| CaCl <sub>2</sub> ·2H <sub>2</sub> O | -1.3849               | 0.6                  | 46                   |
| SnCl <sub>4</sub> ·5H <sub>2</sub> O | 0.6156                | 0.9                  | 54                   |
| CuCl <sub>2</sub> ·2H <sub>2</sub> O | -2.369                | 16                   | 4.5                  |
| MnCl <sub>2</sub> ·4H <sub>2</sub> O | -0.9165               | 0.5                  | 49                   |
| NiCl <sub>2</sub> ·6H <sub>2</sub> O | -2.1678               | 0.5                  | 47                   |
| CoCl <sub>2</sub> ·6H <sub>2</sub> O | -1.7462               | 0                    | 9                    |

Reaction conditions: 5 mmol fructose, 5 mmol catalysts, 25 mmol ChCl, 30 ml MIBK, 110 °C, 2 h

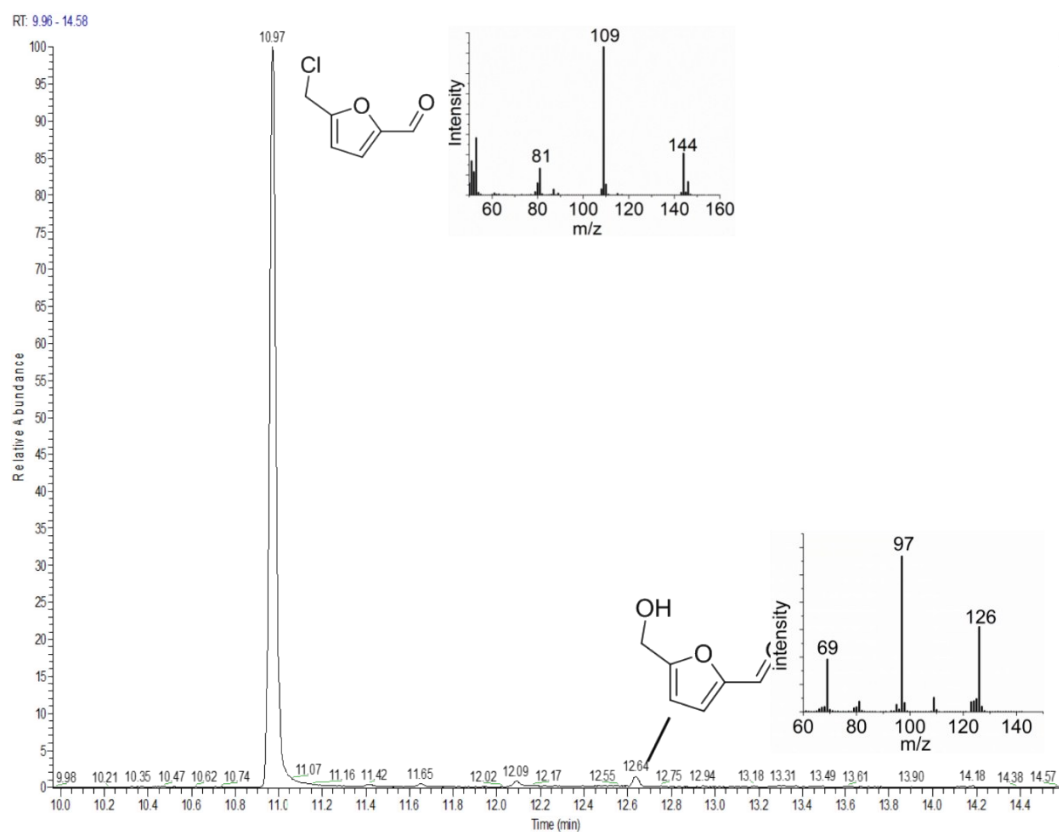**Figure S1.** GC-MS graphic of the product

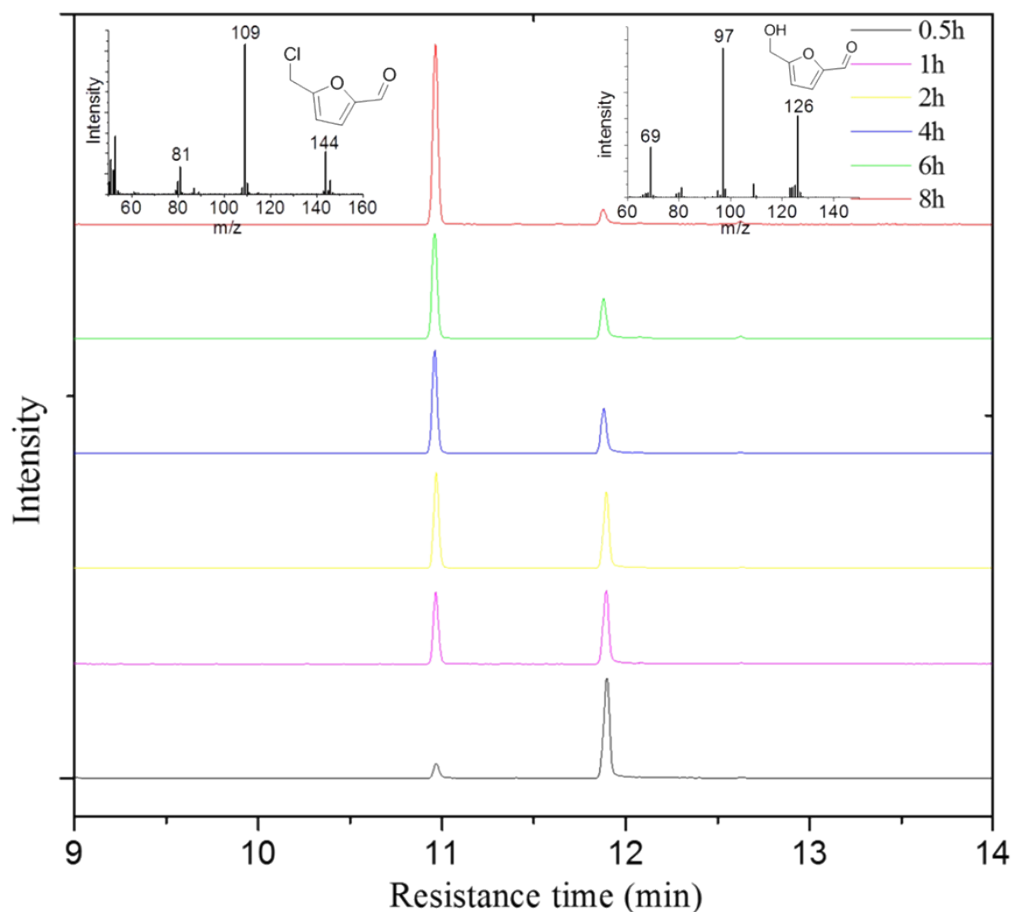

**Figure S2.** GC-MS spectra of the reaction time affected product distribution. Reaction condition: 5 mmol fructose, 5 mmol  $\text{AlCl}_3 \cdot 6\text{H}_2\text{O}$ , 25 mmol ChCl, 30 ml MIBK, 90 °C.

**Table S2.** The effect of IL and DES in the conversion of fructose to 5-CMF and 5-HMF

| Ligand part of IL & DES | $Y_{\text{CMF}}$ (%) | $Y_{\text{HMF}}$ (%) |
|-------------------------|----------------------|----------------------|
| [BMIM]Cl                | 6                    | 4                    |
| [BMIM]BF <sub>4</sub>   | 0                    | 0                    |
| ChCl                    | 50                   | 8                    |

Reaction conditions: 0.5 mmol fructose, 0.5 mmol  $\text{AlCl}_3 \cdot 6\text{H}_2\text{O}$ , 3.6 g IL or ChCl, 30 ml MIBK, 120 °C, 5 h

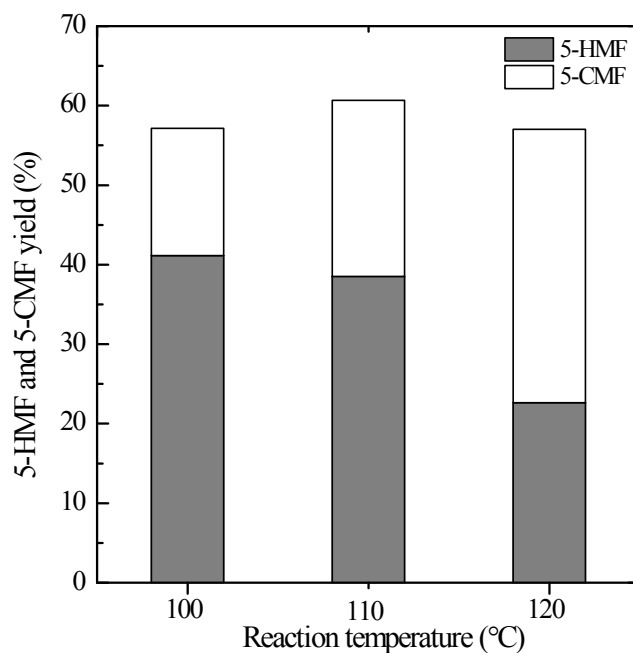

**Figure S3.** Conversion of fructose into 5-CMF & 5-HMF with continuous solvent extraction. Reaction conditions: 5 mmol fructose, 5 mmol  $\text{AlCl}_3 \cdot 6\text{H}_2\text{O}$ , 25 mmol ChCl, 5h, 30 ml \* 3 times MIBK extraction in 1.5 h, 3 h, 5 h.

**Table S3.** Effects of DES composition on the conversion of 5-HMF to 5-CMF

| Entry | Raw material | $\text{AlCl}_3 \cdot 6\text{H}_2\text{O}$ | ChCl | water | HCl | $C_{5\text{-HMF}}^a$ (%) | $Y_{\text{CMF}}$ (%) |
|-------|--------------|-------------------------------------------|------|-------|-----|--------------------------|----------------------|
| 1     | 5-HMF        | ✓                                         |      | ✓     |     | 34                       | 5                    |
| 2     | 5-HMF        | ✓                                         |      |       |     | 19                       | 2                    |
| 3     | 5-HMF        |                                           | ✓    |       |     | 15                       | 0                    |
| 4     | 5-HMF        |                                           | ✓    | ✓     |     | 16                       | 0                    |
| 5     | 5-HMF        | ✓                                         | ✓    |       |     | 100                      | 82                   |
| 6     | 5-HMF        | ✓                                         | ✓    | ✓     |     | 100                      | 86                   |
| 7     | 5-HMF        |                                           |      |       | ✓   | 100                      | 85                   |

Reaction conditions: mole ratio of 5-HMF,  $\text{AlCl}_3 \cdot 6\text{H}_2\text{O}$ , ChCl, water=1:1:5:3. 120 °C, 5h, MIBK 30 ml, HCl 0.5 ml (37 wt%).

**Table S4.** The verification tests of the conversion from 5-HMF to 5-CMF with two steps

| entry | Step 1       |                                      |      |       |                         |                      | Step 2                               |                         |                      |
|-------|--------------|--------------------------------------|------|-------|-------------------------|----------------------|--------------------------------------|-------------------------|----------------------|
|       | Raw material | AlCl <sub>3</sub> ·6H <sub>2</sub> O | ChCl | Water | C <sub>5</sub> -HMF (%) | Y <sub>CMF</sub> (%) | Addition                             | C <sub>5</sub> -HMF (%) | Y <sub>CMF</sub> (%) |
| 1     | HMF          |                                      | √    | √     | 7                       | 0                    | AlCl <sub>3</sub> ·6H <sub>2</sub> O | 76                      | 68                   |
| 2     | HMF          | √                                    |      | √     | 14                      | 5                    | ChCl                                 | 86                      | 79                   |

Reaction conditions: mole ratio of substrate, AlCl<sub>3</sub>·6H<sub>2</sub>O, ChCl, water=1:1:5:3. 120 °C, Step 1: reaction time 2.5 h, Step 2: reaction time 2.5 h, MIBK 30 ml.

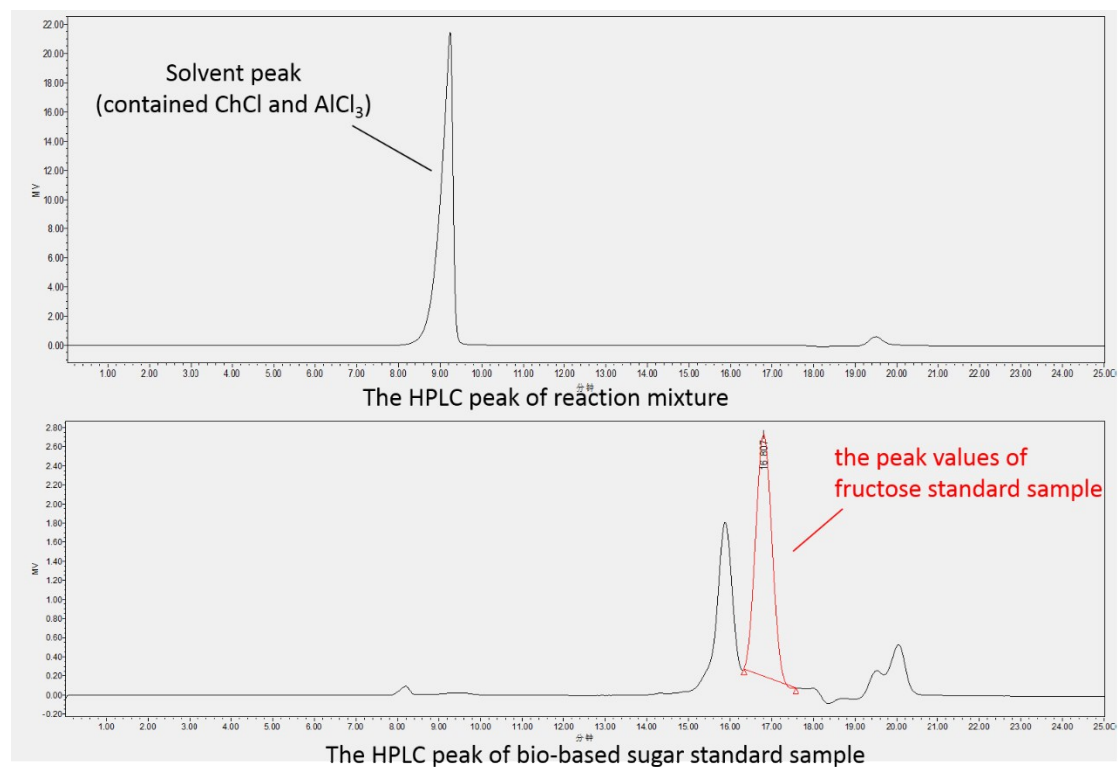**Figure S4.** HPLC analysis graphic of the reaction mixture

## Notes and references

1. P. Panagiotopoulou, N. Martin and D. G. Vlachos, *ChemSusChem*, 2015, 8(12), 2046–2054.
